# Supplementary material
Source: Springer Nature journal article supplement (https://www.springermedizin.de/resource/supplementary/12967_2013_1672_MOESM1_ESM.pdf/9574616)

**anti-CD33**

**anti-CD123**

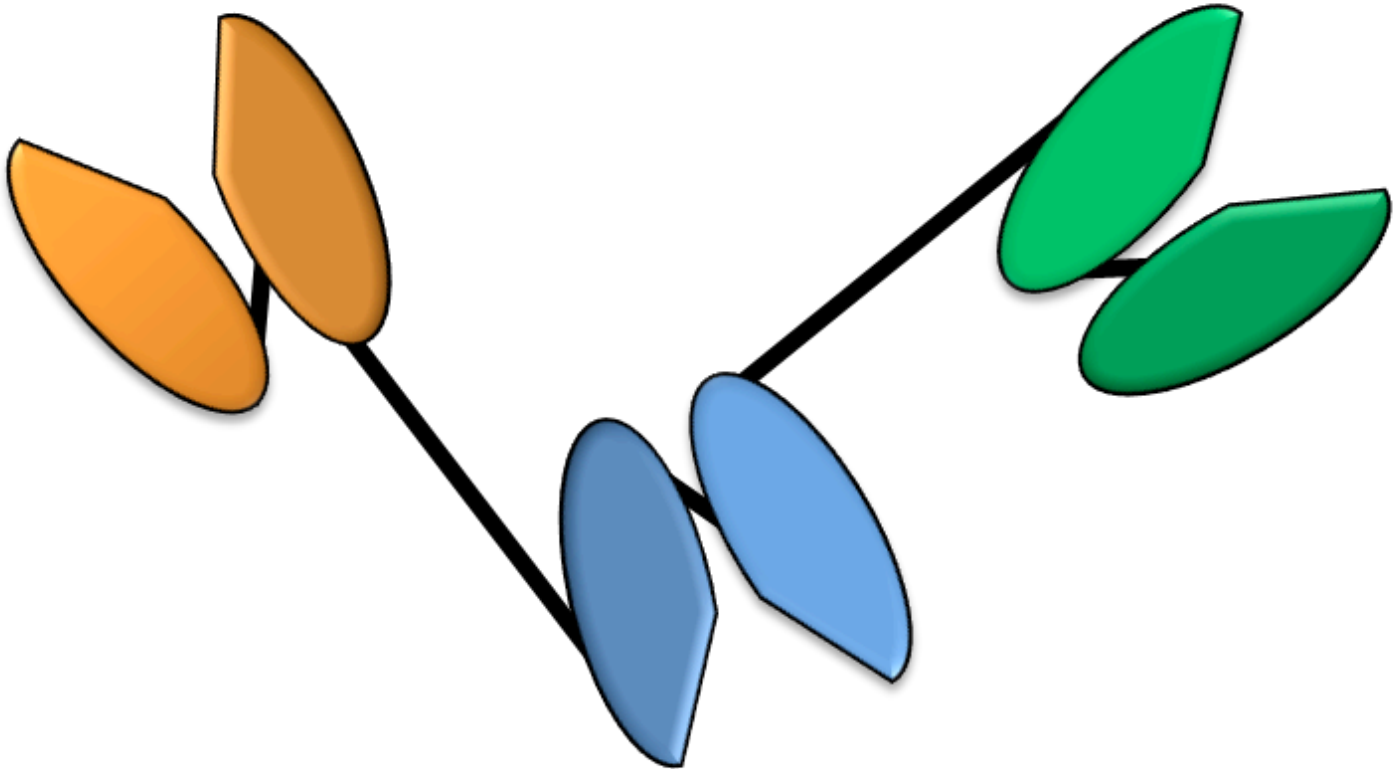

**anti-CD16**

Supplement: MOESM1 [file 9574616]
